# Supplementary material for: Epidemiology of Extraintestinal Manifestations in Chinese Inflammatory Bowel Disease Patients: A Single-Center Retrospective Study
Source: Research Square preprint supplement (doi:10.21203/rs.3.rs-7809551/v1), 2025-11-10
Supplement: Supplementary file 1 [file 46572067c3cf893dbbf196d7.docx]

**Supplement:Comparative Analysis of Extraintestinal Manifestation Prevalence: Institutional Data vs. Western and Asian Populations (Recent Years)**

**
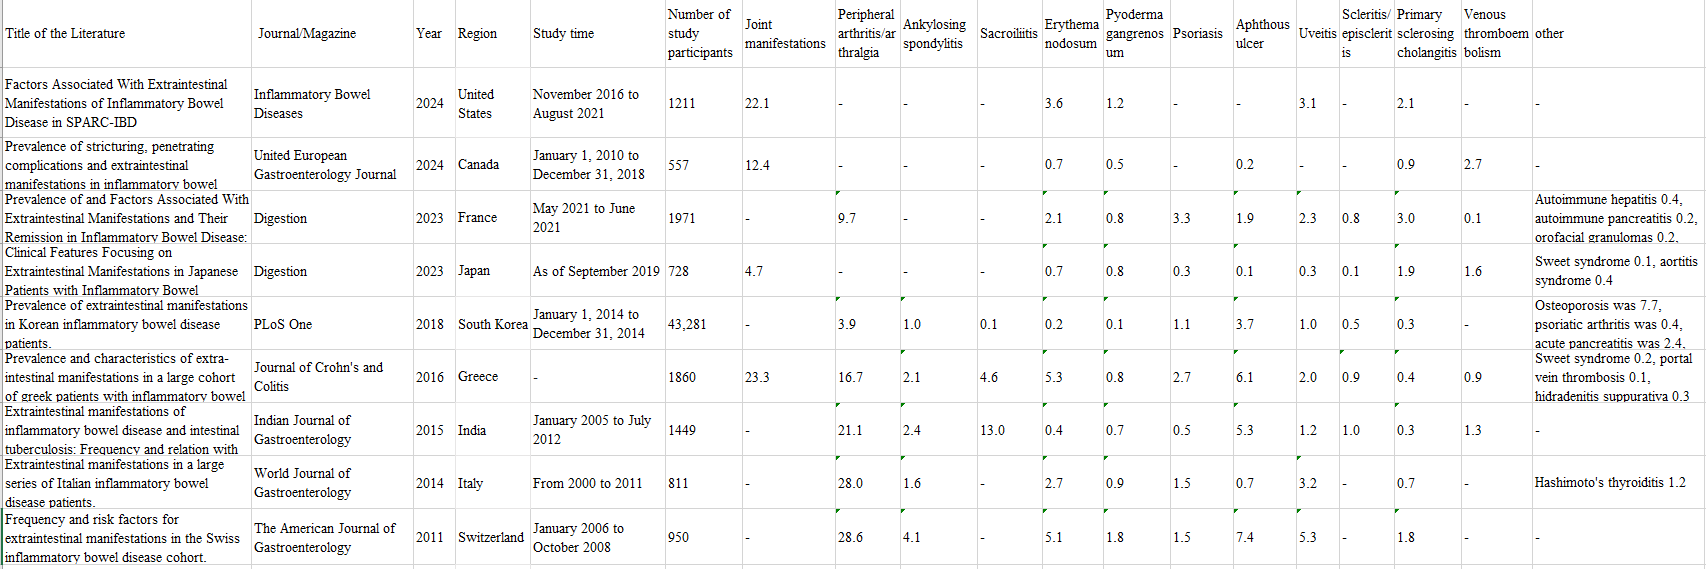
**
